# Supplementary material for: What resources do elderly people choose for managing their symptoms? Clarification of rural older people’s choices of help-seeking behaviors in Japan
Source: BMC Health Serv Res. 2021 Jul 3;21:640. doi: 10.1186/s12913-021-06684-x (PMC8254357; doi:10.1186/s12913-021-06684-x)
Supplement: Supplementary file 1 — Additional file 1. [file 12913_2021_6684_MOESM1_ESM.pdf]

Name ( )

**Diary of your symptoms** ~Please check your symptoms everyday~

[illegible][illegible]
